# Supplementary material for: Sugar-Binding Profiles of Chitin-Binding Lectins from the Hevein Family: A Comprehensive Study
Source: MDPI journal article supplement (doi:10.3390/ijms18061160), 2017-05-30
Supplement: s1 [file s1]

Supplementary table 1-1. Frontal affinity chromatograph data of six lectins.

| lectin  | DSA                            |                              | LEL                            |                              | PWM                            |                              | STL                            |                              | UDA                            |                              | WGA                            |                              |
|---------|--------------------------------|------------------------------|--------------------------------|------------------------------|--------------------------------|------------------------------|--------------------------------|------------------------------|--------------------------------|------------------------------|--------------------------------|------------------------------|
| glycans | V-V <sub>0</sub><br>( $\mu$ l) | K <sub>d</sub><br>( $\mu$ M) | V-V <sub>0</sub><br>( $\mu$ l) | K <sub>d</sub><br>( $\mu$ M) | V-V <sub>0</sub><br>( $\mu$ l) | K <sub>d</sub><br>( $\mu$ M) | V-V <sub>0</sub><br>( $\mu$ l) | K <sub>d</sub><br>( $\mu$ M) | V-V <sub>0</sub><br>( $\mu$ l) | K <sub>d</sub><br>( $\mu$ M) | V-V <sub>0</sub><br>( $\mu$ l) | K <sub>d</sub><br>( $\mu$ M) |
| 001     | 0                              | N.D. <sup>a</sup>            | 0                              | N.D.                         | 0                              | N.D.                         | 0                              | N.D.                         | 32.3                           | 190                          | 0                              | N.D.                         |
| 002     | 0                              | N.D.                         | 8.3                            | 89                           | 0                              | N.D.                         | 0                              | N.D.                         | 26.3                           | 230                          | 19.7                           | 280                          |
| 003     | 0                              | N.D.                         | 0                              | N.D.                         | 0                              | N.D.                         | 0                              | N.D.                         | 38.9                           | 160                          | 0                              | N.D.                         |
| 004     | 0                              | N.D.                         | 0                              | N.D.                         | 10.8                           | 150                          | 0                              | N.D.                         | 425.4                          | 14                           | 0                              | N.D.                         |
| 005     | 0                              | N.D.                         | 0                              | N.D.                         | 5.2                            | 300                          | 0                              | N.D.                         | 502.1                          | 12                           | 0                              | N.D.                         |
| 006     | 0                              | N.D.                         | 0                              | N.D.                         | 0                              | N.D.                         | 0                              | N.D.                         | 543.6                          | 11                           | 0                              | N.D.                         |
| 007     | 0                              | N.D.                         | 0                              | N.D.                         | 5.2                            | 300                          | 0                              | N.D.                         | 727.4                          | 8.4                          | 0                              | N.D.                         |
| 008     | 0                              | N.D.                         | 0                              | N.D.                         | 0                              | N.D.                         | 0                              | N.D.                         | 709.8                          | 8.6                          | 0                              | N.D.                         |
| 009     | 0                              | N.D.                         | 0                              | N.D.                         | 0                              | N.D.                         | 0                              | N.D.                         | 675.8                          | 9.0                          | 0                              | N.D.                         |
| 010     | 18.6                           | 60                           | 0                              | N.D.                         | 0                              | N.D.                         | 0                              | N.D.                         | 761.4                          | 8.0                          | 7.3                            | 760                          |
| 011     | 20.1                           | 56                           | 0                              | N.D.                         | 0                              | N.D.                         | 0                              | N.D.                         | 1117.5                         | 5.5                          | 6.3                            | 880                          |
| 012     | 0                              | N.D.                         | 0                              | N.D.                         | 0                              | N.D.                         | 0                              | N.D.                         | 1017.4                         | 6.0                          | 0                              | N.D.                         |
| 013     | 0                              | N.D.                         | 0                              | N.D.                         | 0                              | N.D.                         | 0                              | N.D.                         | 938.4                          | 6.5                          | 0                              | N.D.                         |
| 014     | 0                              | N.D.                         | 0                              | N.D.                         | 0                              | N.D.                         | 0                              | N.D.                         | 1528.8                         | 4.0                          | 0                              | N.D.                         |
| 015     | 0                              | N.D.                         | 0                              | N.D.                         | 0                              | N.D.                         | 0                              | N.D.                         | 29.6                           | 210                          | 0                              | N.D.                         |
| 016     | 0                              | N.D.                         | 0                              | N.D.                         | 0                              | N.D.                         | 0                              | N.D.                         | 1665.9                         | 3.7                          | 0                              | N.D.                         |
| 017     | 0                              | N.D.                         | 5.1                            | 1100                         |
| 052     | 0                              | N.D.                         | 188.3                          | 30                           |
| 101     | 0                              | N.D.                         | 9.9                            | 560                          |
| 102     | 0                              | N.D.                         | 0                              | N.D.                         | 0                              | N.D.                         | 0                              | N.D.                         | 13.6                           | 450                          | 0                              | N.D.                         |
| 103     | 0                              | N.D.                         |
| 104     | 0                              | N.D.                         | 5.4                            | 1000                         |
| 105     | 0                              | N.D.                         |
| 107     | 0                              | N.D.                         |
| 108     | 0                              | N.D.                         | 4.1                            | 1400                         |
| 201     | 0                              | N.D.                         |
| 202     | 0                              | N.D.                         |
| 203     | 0                              | N.D.                         | 4.5                            | 1200                         |
| 301     | 0                              | N.D.                         |
| 302     | 0                              | N.D.                         | 0                              | N.D.                         | 0                              | N.D.                         | 0                              | N.D.                         | 32.1                           | 190                          | 0                              | N.D.                         |
| 304     | 0                              | N.D.                         |
| 305     | 0                              | N.D.                         | 4.6                            | 1200                         |
| 307     | 0                              | N.D.                         | 0                              | N.D.                         | 0                              | N.D.                         | 5.3                            | 210                          | 8.9                            | 690                          | 0                              | N.D.                         |
| 308     | 0                              | N.D.                         |
| 313     | 53.6                           | 21                           | 0                              | N.D.                         |
| 314     | 0                              | N.D.                         |
| 323     | 281.0                          | 4.0                          | 0                              | N.D.                         |
| 401     | 0                              | N.D.                         |
| 402     | 0                              | N.D.                         | 0                              | N.D.                         | 0                              | N.D.                         | 0                              | N.D.                         | 31.6                           | 190                          | 0                              | N.D.                         |
| 403     | 0                              | N.D.                         |
| 404     | 0                              | N.D.                         | 9                              | 620                          |
| 405     | 0                              | N.D.                         |
| 406     | 0                              | N.D.                         |
| 410     | 50.3                           | 22                           | 0                              | N.D.                         |
| 418     | 273.1                          | 4.1                          | 0                              | N.D.                         |
| 419     | 0                              | N.D.                         |
| 420     | 214.5                          | 5.2                          | 0                              | N.D.                         |
| 501     | 0                              | N.D.                         |
| 502     | 0                              | N.D.                         |
| 503     | 0                              | N.D.                         |
| 504     | 0                              | N.D.                         |
| 506     | 0                              | N.D.                         | 6.0                            | 930                          |
| 601     | 0                              | N.D.                         |
| 602     | 0                              | N.D.                         |

Supplementary table 1-2. Frontal affinity chromatograph data of six lectins.

| Lectin  | DSA                      |                        | LEL                      |                        | PWM                      |                        | STL                      |                        | UDA                      |                        | WGA                      |                        |
|---------|--------------------------|------------------------|--------------------------|------------------------|--------------------------|------------------------|--------------------------|------------------------|--------------------------|------------------------|--------------------------|------------------------|
| Glycans | V-V <sub>0</sub><br>(μl) | K <sub>d</sub><br>(μM) |
| 701     | 35.8                     | 31                     | 0                        | N.D.                   |
| 702     | 0                        | N.D.                   |
| 703     | 0                        | N.D.                   |
| 704     | 12.6                     | 89                     | 0                        | N.D.                   |
| 705     | 0                        | N.D.                   | 5.3                      | 1000                   |
| 706     | 0                        | N.D.                   |
| 707     | 0                        | N.D.                   |
| 708     | 12.3                     | 91                     | 0                        | N.D.                   |
| 709     | 0                        | N.D.                   |
| 710     | 30.1                     | 37                     | 0                        | N.D.                   | 0                        | N.D.                   | 0                        | N.D.                   | 0                        | N.D.                   | 5.3                      | 1000                   |
| 711     | 0                        | N.D.                   |
| 712     | 0                        | N.D.                   | 4.9                      | 1100                   |
| 713     | 0                        | N.D.                   |
| 715     | 0                        | N.D.                   |
| 716     | 0                        | N.D.                   |
| 717     | 0                        | N.D.                   | 9.4                      | 590                    |
| 718     | 0                        | N.D.                   |
| 719     | 13.5                     | 83                     | 0                        | N.D.                   | 0                        | N.D.                   | 0                        | N.D.                   | 12.6                     | 480                    | 7.7                      | 720                    |
| 720     | 0                        | N.D.                   | 4.4                      | 1300                   |
| 721     | 20.9                     | 54                     | 0                        | N.D.                   |
| 722     | 0                        | N.D.                   |
| 723     | 0                        | N.D.                   |
| 724     | 12.3                     | 91                     | 0                        | N.D.                   | 0                        | N.D.                   | 0                        | N.D.                   | 4.3                      | 1400                   | 5.5                      | 1000                   |
| 725     | 16.3                     | 69                     | 0                        | N.D.                   | 0                        | N.D.                   | 0                        | N.D.                   | 5.1                      | 1200                   | 8.0                      | 690                    |
| 726     | 0                        | N.D.                   |
| 727     | 14.9                     | 75                     | 0                        | N.D.                   |
| 728     | 0                        | N.D.                   |
| 729     | 17.2                     | 65                     | 0                        | N.D.                   |
| 730     | 13.8                     | 81                     | 0                        | N.D.                   |
| 731     | 16.6                     | 67                     | 0                        | N.D.                   |
| 732     | 0                        | N.D.                   |
| 733     | 25.9                     | 43                     | 110.4                    | 6.7                    | 12.4                     | 130                    | 8.2                      | 130                    | 208.3                    | 29                     | 59.4                     | 93                     |
| 734     | 59.0                     | 19                     | 208.9                    | 3.5                    | 17.0                     | 93                     | 5.0                      | 220                    | 174.9                    | 35                     | 52.9                     | 110                    |
| 735     | 15.2                     | 74                     | 0                        | N.D.                   |
| 736     | 18.0                     | 62                     | 0                        | N.D.                   |
| 737     | 0                        | N.D.                   |
| 738     | 0                        | N.D.                   |
| 739     | 0                        | N.D.                   |
| 901     | 12.9                     | 87                     | 0                        | N.D.                   |
| 902     | 23.5                     | 48                     | 19.1                     | 39                     | 0                        | N.D.                   | 0                        | N.D.                   | 4.6                      | 1300                   | 5.6                      | 990                    |
| 903     | 25.8                     | 43                     | 71.7                     | 10                     | 0                        | N.D.                   | 0                        | N.D.                   | 13.2                     | 460                    | 10.1                     | 550                    |
| 905     | 65.3                     | 17                     | 256.7                    | 2.9                    | 0                        | N.D.                   | 0                        | N.D.                   | 62.5                     | 98                     | 21.5                     | 260                    |
| 906     | 0                        | N.D.                   | 161.1                    | 4.6                    | 0                        | N.D.                   | 0                        | N.D.                   | 107.0                    | 57                     | 1189.9                   | 4.7                    |
| 907     | 26.2                     | 43                     | 172.5                    | 0.64                   | 29.9                     | 53                     | 90.1                     | 12                     | 1586.8                   | 3.8                    | 1357.9                   | 4.1                    |
| 908     | 42.7                     | 26                     | 0                        | N.D.                   | 0                        | N.D.                   | 0                        | N.D.                   | 0                        | N.D.                   | 4.7                      | 1200                   |
| 909     | 18.0                     | 62                     | 0                        | N.D.                   |
| 910     | 0                        | N.D.                   |
| 911     | 0                        | N.D.                   |
| 913     | 0                        | N.D.                   | 4.1                      | 1400                   |
| 914     | 14.3                     | 78                     | 0                        | N.D.                   |
| 915     | 0                        | N.D.                   |
| 918     | 12.3                     | 91                     | 0                        | N.D.                   |
| 919     | 0                        | N.D.                   |
| 920     | 18.0                     | 62                     | 0                        | N.D.                   |
| 921     | 0                        | N.D.                   |
| 927     | 42.7                     | 26                     | 0                        | N.D.                   |
| 928     | 32.4                     | 35                     | 0                        | N.D.                   |
| 929     | 37.0                     | 30                     | 0                        | N.D.                   |
| 930     | 35.5                     | 32                     | 0                        | N.D.                   |
| 936     | 0                        | N.D.                   | 21.3                     | 35                     | 0                        | N.D.                   | 0                        | N.D.                   | 31.4                     | 190                    | 14.8                     | 380                    |
| 937     | 0                        | N.D.                   | 33.8                     | 22                     | 0                        | N.D.                   | 0                        | N.D.                   | 36.3                     | 170                    | 10.5                     | 530                    |
| 051     | - <sup>b</sup>           | -                      | -                        | -                      | -                        | -                      | -                        | -                      | -                        | -                      | 271.7                    | 20                     |
| 053     | -                        | -                      | -                        | -                      | -                        | -                      | -                        | -                      | -                        | -                      | 286.4                    | 19                     |
| 055     | -                        | -                      | -                        | -                      | -                        | -                      | -                        | -                      | -                        | -                      | 169.5                    | 33                     |
| 056     | -                        | -                      | -                        | -                      | -                        | -                      | -                        | -                      | -                        | -                      | 0                        | N.D.                   |
| 057     | -                        | -                      | -                        | -                      | -                        | -                      | -                        | -                      | -                        | -                      | 0                        | N.D.                   |
| 058     | -                        | -                      | -                        | -                      | -                        | -                      | -                        | -                      | -                        | -                      | 292.4                    | 19                     |
| 205     | -                        | -                      | -                        | -                      | -                        | -                      | -                        | -                      | -                        | -                      | 0                        | N.D.                   |
| 310     | -                        | -                      | -                        | -                      | -                        | -                      | -                        | -                      | -                        | -                      | 32.7                     | 170                    |
| 311     | -                        | -                      | -                        | -                      | -                        | -                      | -                        | -                      | -                        | -                      | 18.9                     | 290                    |

<sup>a</sup> "N.D." mean "not detected". <sup>b</sup> "-" is no date.
